## **SKN-1 is a metabolic surveillance factor that monitors amino acid catabolism to control stress resistance**

Phillip A. Frankino<sup>1,2,4</sup>, Talha F. Siddiqi<sup>1,2,4</sup>, Theodore Bolas<sup>1,2,4</sup>, Raz Bar-Ziv<sup>1,2,4</sup>, Holly K. Gildea<sup>1,2,3,4</sup>, Hanlin Zhang<sup>1,2,4</sup>, Ryo Higuchi-Sanabria<sup>5</sup> and Andrew Dillin<sup>1,2,3,4,6</sup>

### **Affiliation:**

<sup>1</sup>Howard Hughes Medical Institute University of California, Berkeley, CA 94720

<sup>2</sup>California Institute for Regenerative Medicine, Berkeley, CA 94720 USA

<sup>3</sup>Helen Wills Neuroscience Institute

<sup>4</sup>Department of Molecular and Cell Biology, University of California, Berkeley

<sup>5</sup>Leonard Davis School of Gerontology, University of Southern California, Los Angeles, CA 90089 USA

<sup>6</sup>Correspondence to [dillin@berkeley.edu](mailto:dillin@berkeley.edu)

1 **SUMMARY**

2 The deleterious potential to generate oxidative stress and damage is a fundamental challenge to  
3 metabolism. The oxidative stress response transcription factor, SKN-1/NRF2, can sense and  
4 respond to changes in metabolic state, although the mechanism and physiological consequences  
5 of this remain unknown. To explore this connection, we performed a genetic screen in *C. elegans*  
6 targeting amino acid catabolism and identified multiple metabolic pathways as regulators of  
7 SKN-1 activity. We found that genetic perturbation of the conserved amidohydrolase  
8 *T12A2.1/amdh-1* activates a unique subset of SKN-1 regulated detoxification genes.  
9 Interestingly, this transcriptional program is independent of canonical P38-MAPK signaling  
10 components but requires the GATA transcription factor ELT-3, nuclear hormone receptor NHR-  
11 49, and mediator complex subunit MDT-15. This activation of SKN-1 is dependent on upstream  
12 histidine catabolism genes HALY-1 and Y51H4A.7/UROC-1 and may occur through  
13 accumulation of a catabolite, 4-imidazolone-5-propanoate (IP). Triggering SKN-1 activation  
14 results in a physiological trade off of increased oxidative stress resistance but decreased survival  
15 to heat stress. Together, our data suggest that SKN-1 is a key surveillance factor which senses  
16 and responds to metabolic perturbations to influence physiology and stress resistance.

17

18

19

20

21

22

23

## 24 INTRODUCTION

25 Metabolism is central to normal cell function and is dysregulated in human diseases such as  
26 metabolic syndrome, diabetes, and cancer (DeBerardinis and Thompson, 2012). In the most basic  
27 sense, metabolism is the sum of all biochemical reactions in the cell, including reactions that  
28 create or break down complex molecules (anabolism and catabolism, respectively). The  
29 catabolism of amino acids leads to the accumulation of breakdown products, or catabolites, that  
30 are essential for creating cellular energy through the tricarboxylic acid (TCA) cycle and cellular  
31 respiration (Martínez-Reyes and Chandel, 2020). Outside of their role in creating cellular energy,  
32 many of these catabolites have been identified as signaling molecules that affect both normal cell  
33 function and disease. For example, tryptophan catabolites are known immunomodulators, and  
34 elevated expression of tryptophan catabolism enzymes is associated with cancer progression and  
35 poor prognosis (McGaha et al., 2012). Additionally, the histidine catabolite, imidazolone  
36 propionate, is elevated in type 2 diabetic patients and has been shown to impair insulin signaling  
37 (Chong et al., 2018; Molinaro et al., 2020). Despite their importance, our understanding of the  
38 identity, mechanism and physiological consequences of catabolite signaling is incomplete.

39 A key challenge for metabolism is the resolution of deleterious byproducts that can damage  
40 cellular components. For example, the electron transport chain of the mitochondria is the main  
41 site of ATP generation but also produces harmful reactive oxygen species (ROS), a form of  
42 oxidative stress that damages DNA, lipid membranes and proteins (Nolfi-Donagan et al., 2020).  
43 To resolve oxidative damage, cells have evolved a conserved stress response controlled by the  
44 transcription factor SKN-1/NRF2 that upregulates antioxidant synthesis and detoxification  
45 enzymes to neutralize oxidants and export toxic molecules from the cell (Blackwell et al., 2015).  
46 In the nematode *C. elegans*, the oxidative stress response (OxSR) is initiated in response to

47 oxidative damage through a signaling cascade that converges on the conserved map kinase  
48 (MAPK) pathway, resulting in the phosphorylation and activation of the MAPKK and  
49 P38/MAPK homologs (SEK-1 and PMK-1, respectively) (Inoue et al., 2005). Once this signaling  
50 cascade is initiated, nuclear factors such as ELT-3, NHR-49, and MDT-15 are required for  
51 upregulation of stress response targets (Goh et al., 2014, 2018; Hu et al., 2017; Wu et al., 2016).  
52 Together, the OxSR alleviates oxidative stress and restores homeostasis to promote cell and  
53 organismal survival.

54 Historically, SKN-1 is known as the master regulator of the OxSR but emerging literature has  
55 implicated it as a metabolic surveillance factor. For example, exogenous supplementation of  
56 amino acids are sensed and activate SKN-1-mediated transcription (Edwards et al., 2015). SKN-  
57 1 can also respond to changes in proline catabolism to mobilize lipids during starvation (Pang et  
58 al., 2014). Furthermore, genetic perturbation of multiple amino acid catabolic pathways activates  
59 SKN-1-mediated transcription (Fisher et al., 2008; Ravichandran et al., 2018; Tang and Pang,  
60 2016). Intriguingly, these instances of SKN-1 activation may involve diverse catabolites,  
61 integrating the state of multiple metabolic pathways to sense and respond to metabolic imbalance  
62 through a single effector. To date, no study has comprehensively probed metabolic pathways to  
63 understand the surveillance and response role of SKN-1 in metabolism.

64 Here, we identify multiple pathways of amino acid catabolism that, when perturbed, activate a  
65 distinct transcriptional response driven by SKN-1. Using a mutant of histidine catabolism as a  
66 model, we show that this response is independent of canonical MAPK signaling pathways and  
67 may partially depend on GCN2 and mTOR homologs *gcn-2* and *let-363*. We also demonstrate  
68 the necessity of nuclear factors previously implicated in the OxSR for SKN-1 activation.  
69 Interestingly, this response is dependent on the upstream enzymes of the histidine catabolism

70 pathway, suggesting endogenous catabolites may activate SKN-1. Activation of SKN-1 via  
71 mutation of the histidine catabolism pathways results in increased oxidative stress resistance at  
72 the cost of decreased resistance to heat stress indicating that SKN-1 mediates a tradeoff between  
73 stress response survival. Together, our data uncover a novel metabolic surveillance mechanism  
74 driven by SKN-1, which likely works through accumulation of catabolite intermediates, to  
75 control susceptibility to stress.

## 76 **RESULTS**

### 77 **Genetic perturbation of amino acid catabolism pathways activates SKN-1**

78 To uncover the genetic mechanisms by which SKN-1 serves as a metabolic surveillance factor,  
79 we performed an RNAi screen to comprehensively survey amino acid catabolism pathways that,  
80 when perturbed, activate a SKN-1 dependent transcriptional response. We constructed a sub-  
81 library containing 78 RNAi clones targeting catabolic pathways for all of the 20 proteinogenic  
82 amino acids including genes involved in glutathione (GSH) synthesis (table 1). Using this RNAi  
83 sub-library, we assessed SKN-1 activity by measuring the fluorescence of animals expressing  
84 GFP downstream of the *gst-4* promoter (*gst-4p::GFP*), a well established reporter of SKN-1  
85 (Link and Johnson, 2002). Notably, we found that knockdown of glutathione synthesis, tyrosine  
86 or valine catabolism enzymes activate the SKN-1 reporter as previously described, confirming  
87 the ability of our screen to identify known regulating enzymes of, and pathways surveilled by,  
88 SKN-1 (fig. 1a, table 1) (Fisher et al., 2008; Wang et al., 2010). Interestingly, we found that  
89 genetic perturbation of histidine, glycine and phenylalanine catabolism led to activation of SKN-  
90 1 (fig. 1a, table 1). Together, these results suggest that SKN-1 is a metabolic regulator which  
91 responds to changes in multiple amino acid catabolism pathways, and possibly directly to amino  
92 acid levels.

93 **Knockout of histidine catabolism enzyme AMDH-1 triggers a SKN-1-mediated**  
94 **detoxification response**

95 Our screen revealed that the phenylalanine, glycine and histidine catabolism pathways are  
96 surveilled by SKN-1, and activate this transcription factor when perturbed. Both phenylalanine,  
97 through the phenylalanine hydroxylase *pah-1*, and glycine catabolism, through the glycine  
98 cleavage protein *gldc-1*, have established connections to SKN-1 via the NADPH oxidase *bli-3*  
99 and antioxidant synthesis, respectively (Calvo et al., 2008). We chose the conserved histidine  
100 catabolism pathway as a model to further elucidate this mechanism of SKN-1 activation, as  
101 histidine is an essential amino acid and its metabolic pathway remains largely uncharacterized in  
102 *C. elegans*. *T12A2.1*, which was renamed **AMiDoH**ydrolase domain containing protein **1** (*amdh-*  
103 *I*), is a conserved amidohydrolase in the histidine catabolism pathway that processes its  
104 substrate, 4-imidazolone-5-propanoate (IP), to create N-formimino-L-glutamate (FIGLU) (fig  
105 1b). To further explore the mechanism of SKN-1 surveillance of amino acid catabolic processes,  
106 we used CRISPR-Cas9 to generate a putative null allele, *amdh-1(uth29)*, by introducing a  
107 premature stop codon in exon 1 of its coding sequence (supplemental figure 1). We found that  
108 *amdh-1* mutants robustly induce the SKN-1 reporter strain in a SKN-1-dependent manner,  
109 compared to wild-type animals (fig 1c,d). To determine whether *amdh-1* mutation altered global  
110 SKN-1 transcription, we analyzed gene expression changes in *amdh-1* mutants versus wild-type  
111 animals (fig 1e, table S1). We found that a unique subset of SKN-1 targets, the detoxification  
112 enzyme family of glutathione-s-transferases (GSTs), were among the most upregulated genes in  
113 our dataset, suggesting that changing AMDH-1 levels triggers a specific transcriptional output,  
114 likely driven by SKN-1. Direct comparison of differentially expressed genes (DEGs) in our  
115 dataset to previously published datasets revealed that genes upregulated in *amdh-1* mutants were

116 also highly upregulated in *skn-1(lax188)* gain-of-function animals and downregulated in worms  
117 treated with *skn-1* RNAi (fig 1f) (Nhan et al., 2019; Steinbaugh et al.). In contrast,  
118 downregulated genes in *amdh-1* mutant animals were not differentially regulated under *skn-1*  
119 loss or gain-of-function, suggesting that AMDH-1 may also impact SKN-1-independent  
120 processes. Interestingly, knockdown of *amdh-1* did not affect the expression of another well-  
121 characterized SKN-1 reporter (*gcs-1p::GFP*), further suggesting that there are distinct  
122 transcriptional responses modulated by SKN-1 (supplemental fig 1b,c). Taken together, our data  
123 show that perturbation of histidine catabolism upregulates a specific transcriptional program  
124 driven by SKN-1, that is only a subset of the general oxidative stress response, and is likely  
125 tailored for the perturbation of histidine catabolism. This response includes detoxification  
126 enzymes but not other known SKN-1 targets such as antioxidant synthesis enzymes.

127 **SKN-1 activation in *amdh-1* mutants is dependent on known oxidative stress regulators but**  
128 **not canonical p38/MAPK or nutrient signaling pathways**

129 Amino acids play essential roles in maintaining energy homeostasis, a process controlled by a  
130 few key nutrient regulators (Efeyan et al., 2015). Therefore, we hypothesized that perturbation of  
131 histidine catabolism, and thus SKN-1 activation, may be tightly regulated by these nutrient  
132 sensing pathways. To test this hypothesis, we knocked down orthologs of nutrient regulators  
133 mTORC1/2 (*let-363*), RRAGA (*raga-1*), AMPK (*aak-2*), FOXO (*daf-16*), TFEB (*hlh-30*) and  
134 GCN2 (*gcn-2*) and surveyed SKN-1 activation in *amdh-1* mutants. Strikingly, we observed that  
135 none of these regulators were completely required for SKN-1 activation (supplemental figure  
136 2a,b). Knockdown of *aak-2* had no effect while *daf-16*, *hlh-30* or *raga-1* further increased SKN-  
137 1 activation in *amdh-1* mutants. Notably, *gcn-2* or *let-363* knockdown significantly decreased  
138 SKN-1 activation in these mutants, although SKN-1 levels remained over 2 fold greater

139 ( $\log_2(\text{FC}) > 1$ ) in *amdh-1* mutants compared to wild-type animals fed RNAi against these genes  
140 (supplemental figure 2a,b). Interestingly, we observed increased activation of SKN-1 in *raga-1*  
141 knockdown conditions, targeting RRAGA/mTORC1, and suppression of activation upon *let-363*  
142 knockdown, targeting both mTORC1/mTORC2. These data suggest that activation of SKN-1 in  
143 *amdh-1* mutants may depend on GCN2 and mTORC2 while it is independent of other nutrient  
144 regulators AMPK, FOXO, TFEB and mTORC1/RRAGA.

145 In *C. elegans*, SKN-1 can be activated via phosphorylation by the p38/MAPK ortholog, PMK-1,  
146 in a signaling cascade that requires the MAPKK, SEK-1 (Inoue et al., 2005). To assess the  
147 requirements of these well established regulators on SKN-1 activation, we tested whether  
148 animals with mutations in this pathway can still activate SKN-1 upon *amdh-1* knockdown. We  
149 observed that *pmk-1(km25)* and *sek-1(km4)* mutants fail to suppress SKN-1 activation and  
150 instead exhibit increased activation with *amdh-1* knockdown (fig 2a,b). These data show that  
151 canonical MAPK regulators are not required for SKN-1 activation in the face of metabolic  
152 perturbations and may even negatively regulate this response.

153 To identify genetic pathways required for SKN-1 activation in *amdh-1* mutants, we performed a  
154 genetic suppressor screen using EMS mutagenesis on SKN-1 reporter animals in an *amdh-*  
155 *1(uth29)* background. Using a combination of backcrossing and deep sequencing as previously  
156 described (Lehrbach et al., 2017), we identified 6 alleles in 4 genes that are required for SKN-1  
157 activation in *amdh-1* mutants (supplemental figure 2c). Among the mutants identified was a  
158 putative DNA binding domain mutant of *skn-1* that is present across all four isoforms  
159 (supplemental figure 2c). These worms are slow growing, likely due to the requirement for SKN-  
160 1 in development (Bowerman et al., 1992). The discovery of this new SKN-1 allele validates the  
161 screen and supports the previous finding that this phenotype is dependent on *skn-1* (figure 1c,d).



162 Among the remaining mutations found in our screen, we identified a novel SKN-1 regulator,  
163 *suco-1*, and a previously identified regulator, *elt-3*, as suppressors of SKN-1 activity in *amdh-1*  
164 (*uth29*) mutant animals (supplemental figure 2c). RNAi knockdown of *suco-1* or *elt-3* suppress  
165 SKN-1 activation in *amdh-1* mutants, phenocopying the EMS mutants and suggesting a causal  
166 relationship between these regulators and SKN-1 (fig2c,d). *suco-1* encodes an ortholog of the  
167 SLP/EMP65 complex identified in yeast to function in ER protein homeostasis, a process  
168 previously implicated in the OxSR (Glover-Cutter et al., 2013; Zhang et al., 2017). *elt-3* is a  
169 required factor for induction of OxSR gene expression (Hu et al., 2017). The existing role of *elt-*  
170 *3* in the OxSR prompted further investigation of other required nuclear factors.

171 SKN-1 drives expression of detoxification enzymes, such as GST-4, under conditions of  
172 oxidative stress with the help of nuclear factors like ELT-3, nuclear hormone receptor NHR-49,  
173 and mediator complex subunit, MDT-15 (Goh et al., 2014, 2018; Hu et al., 2017; Wu et al.,  
174 2016). As these nuclear factors are well established to be required for both stress response gene  
175 transcription and survival upon oxidative stress, we hypothesized that they may also be required  
176 for SKN-1 activation in *amdh-1* mutants. We found that knockdown of *nhr-49* or *mdt-15*  
177 significantly suppressed the activation of SKN-1 in *amdh-1(uth29)* mutants (fig 2c,d). Together,  
178 these data suggest that activation of SKN-1 in animals with perturbed histidine catabolism is  
179 dependent on canonical nuclear regulators of the OxSR.

## 180 **Enzymes HALY-1 and Y51H4A.7/UROC-1 are required for SKN-1 activation in AMDH-1** 181 **mutants**

182 Through the EMS suppressor screen, we also identified 3 independent alleles of *haly-1* (*uth92*,  
183 *uth93*, *uth95*), the conserved histidine ammonia lyase that is rate limiting for the histidine

184 catabolism pathway, as suppressors of SKN-1 activity (fig 3a, supplemental figure 2c).  
185 Expression of a wild-type copy of *haly-1* rescued the suppression of SKN-1 activation in *haly-*  
186 *I(uth92)* and *haly-1(uth93)* mutants, confirming the causative nature of these mutations  
187 (supplemental figure 3a,b).

188 AMDH-1 is the third enzyme in the catabolism of histidine to glutamate. Two upstream enzymes  
189 conserved in *C. elegans*, HALY-1 and Y51H4A.7, renamed to **URO**canate hydratase protein 1,  
190 UROC-1, catalyze histidine to glutamate conversion through the formation of two intermediate  
191 catabolites, urocanate and IP (fig 1b). One possible mechanism, supported by the finding that  
192 *haly-1* mutants suppress SKN-1 activation in *amdh-1* mutants, is that catabolite buildup activates  
193 SKN-1. To explore this possibility, we performed epistasis experiments using RNAi to knock  
194 down the upstream enzymes of the histidine catabolism pathways in *amdh-1* mutant animals. If a  
195 buildup of the second catabolite, IP, leads to SKN-1 activation, knockdown of *uroc-1* would also  
196 suppress SKN-1 activation. We found that RNAi knockdown of *haly-1* phenocopies the  
197 suppression seen in *haly-1* mutants and that *uroc-1* completely suppressed the activation of  
198 SKN-1 in *amdh-1* mutants (fig 3b,c). These findings support the hypothesis that SKN-1  
199 activation in these mutants proceed through a catabolite intermediate, likely IP.

## 200 **Histidine supplementation amplifies SKN-1 activation in AMDH-1 mutants**

201 The poor solubility and short half-life of catabolites upstream of *amdh-1*, urocanate and IP,  
202 prevented the direct testing of catabolite activation. Rather, we tested whether increasing flux  
203 through the histidine catabolism pathway differentially affects *amdh-1* mutants compared to wild  
204 type animals. Notably, this differential activation would depend on one or both of the upstream  
205 enzymes, *haly-1* and *uroc-1*, if the mechanism proceeds through a catabolite intermediate.

206 Accordingly, we supplemented SKN-1 reporter animals, in both wild-type and *amdh-1* mutant  
207 backgrounds, with histidine. Strikingly, *amdh-1* mutant animals exhibit a robust activation of  
208 SKN-1 upon histidine supplementation when compared to wildtype animals (fig. 3d,e). Indeed,  
209 this activation is partially suppressed by knockdown of *haly-1* and completely suppressed by  
210 knockdown of *Y51H4A.7/uroc-1* (Fig 3f,g). These data further support a model that the catabolite  
211 intermediate IP drives SKN-1 activation.

### 212 ***amdh-1* mutants are sensitive to heat stress and resistant to oxidative stress**

213 SKN-1 can be either beneficial or detrimental to organismal physiology and aging depending on  
214 expression level. For example, moderate activation of SKN-1 extends lifespan while high  
215 expression can shorten lifespan (Paek et al., 2012; Tullet et al., 2008). Moreover, activation of  
216 SKN-1 increases oxidative stress survival while decreasing survival to other stressors such as  
217 heat (Crombie et al., 2016; Deng et al., 2020). Considering the strong induction of SKN-1 upon  
218 *amdh-1* loss of function, we questioned whether this activation was beneficial or detrimental to  
219 organismal health. First, we assessed the lifespans of *amdh-1(uth29)* mutants compared to wild-  
220 type animals and found no significant effect on adult lifespan (fig. 4a). We next tested whether  
221 SKN-1 activation affects the animal's ability to survive different stress conditions. Predictably,  
222 *amdh-1* mutants are resistant to tert-butyl hydroperoxide, an organic peroxide known to induce  
223 the OxSR, likely representing a “priming” effect that SKN-1 has on these animals to survive  
224 oxidative stress (fig. 4b). Surprisingly, we observed a stark change in resistance to thermal stress,  
225 a 50% decrease in thermotolerance compared to wildtype animals. The decreased  
226 thermotolerance of *amdh-1* mutants was completely rescued by RNAi knockdown of *skn-1*,  
227 suggesting that SKN-1 activation is detrimental to thermotolerance (fig. 4c). Additionally, stress  
228 survival on tunicamycin was also modestly reduced (fig. 4d). Notably, we did not observe a

229 change in any other fluorescent reporters that measure the activation of other cellular stress  
230 responses (supplemental figure 4a-e). Together, our data suggest that SKN-1 activation in *amdh-*  
231 *I* mutants drives a physiological tradeoff that preserves survival under oxidative stress conditions  
232 at the cost of heat and ER stress resilience without a significant impact on these well defined  
233 transcriptional stress responses.

## 234 **DISCUSSION**

### 235 **SKN-1 as a metabolic surveillance factor**

236 Previous studies have reported that perturbation of tryptophan, threonine, or proline catabolism  
237 evoke a SKN-1-mediated transcriptional response (Fisher et al., 2008; Pang et al., 2014; Tang  
238 and Pang, 2016; Ravichandran et al., 2018). Our work expands this list to include glycine, valine,  
239 phenylalanine and histidine catabolism as surveillance targets of SKN-1, which can have direct  
240 effects on stress resilience. Further, we demonstrate that knockdown of a conserved  
241 amidohydrolase in the histidine catabolism pathway leads to a buildup of a catabolite, likely IP,  
242 to activate a transcriptional response driven by SKN-1. This response appears partially  
243 dependent on nutrient regulators, GCN-2 and mTORC2, and OxSR regulators ELT-3, NHR-49  
244 and MDT-15 (fig. 4e). It is unknown whether SKN-1 activation in this context is a direct or  
245 indirect consequence of catabolite buildup, however the activation of SKN-1 results in a clear  
246 trade-off of increased oxidative stress resilience for increased sensitivity to heat stress.

247 Interestingly, existing literature suggests multiple amino acid catabolites can signal to SKN-1.  
248 For example, proline catabolism is modulated upon pathogen exposure to accumulate the  
249 intermediate pyrroline-5-carboxylate (P5C) to activate SKN-1 through ROS production (Tang  
250 and Pang, 2016). Other reports have demonstrated that the perturbation of tyrosine catabolism,

251 through mutation in fumarylacetoacetate hydrolase, *fah-1*, causes stunted growth and intestinal  
252 degradation through tyrosine catabolites (Fisher et al., 2008). Intriguingly, this mutation also  
253 activates a SKN-1-dependent transcriptional reporter, and these phenotypes can be reversed  
254 through knockdown of upstream enzymes (Fisher et al., 2008). Our findings help unify these  
255 previously observed phenomena and suggest that SKN-1 is a metabolic surveillance factor that  
256 can integrate information from multiple catabolite activators into transcriptional programs to  
257 affect physiology.

258 Importantly, amino catabolism pathways are implicated in disease progression and cancer  
259 treatment. A previous study has shown that perturbation of this pathway decreases sensitivity to  
260 the chemotherapeutic methotrexate and increasing flux through this pathway has been proposed  
261 to increase methotrexate efficacy in patients (Kanarek et al., 2018). While simple dietary  
262 intervention is appealing, our understanding of the consequences of catabolite buildup remains  
263 incomplete. Indeed, one study indicates that histidine supplementation can cause hepatic  
264 enlargement in patients with liver disease (Holeček, 2020). Moreover, in type I tyrosinemia,  
265 tyrosine catabolite buildup is thought to be a main source of damage to proteins and DNA,  
266 contributing to pathology (Ferguson et al., 2010). We observe that histidine catabolites can also  
267 signal to effectors, such as SKN-1, to modulate physiology. Thus, further studies to uncover the  
268 clear role of catabolite intermediates as important modulators of cell signaling is at the forefront  
269 of understanding human disease.

#### 270 **4-Imidazolone-5-Propanoate (IP) as a signaling catabolite**

271 Enzymes of the histidine catabolism pathway are highly conserved from bacteria to humans  
272 (Bender, 2012). Interestingly, mutations in the conserved IPase in *Klebisella aerogenes* are

273 innocuous unless supplemental histidine is added and upstream enzymes are active, in which  
274 case the bacteria are poisoned and fail to grow (Boylan and Bender, 1984). This phenotype bears  
275 striking resemblance to the phenotype observed here, in which *C. elegans* mutants for the IPase,  
276 *amdh-1*, show exaggerated phenotypes when supplemented with histidine, dependent on the  
277 upstream enzymes *haly-1* and *uroc-1*. To date, no direct experimentation has shown the toxicity  
278 of this catabolite, likely due to the short half-life of IP (Bowser Revel and Magasanik, 1958; Rao  
279 and Greenberg, 1961). IP may either directly or indirectly activate SKN-1 through a breakdown  
280 product, production of oxidative stress or through a distinct mechanism. Indeed, 4-imidazolones  
281 have previously been shown to cause oxidative stress and make up many advanced glycation  
282 end-products (AGEs), biomarkers that correlate with aging and metabolic disease (Niwa et al.,  
283 1997; Omar et al., 2018).

#### 284 **Requirements of SKN-1 activation in *amdh-1* mutants**

285 To date, the MAPK signaling pathway has been reported to control nearly all instances of SKN-1  
286 activation in *C. elegans* (Blackwell et al., 2015). Here we report a SKN-1 transcriptional  
287 response to altered histidine catabolism that is independent of conserved MAPK components  
288 *sek-1* and *pmk-1*. Although the identity of upstream signaling components remain elusive,  
289 several kinases known to influence SKN-1 activation remain as candidates downstream of the  
290 signaling catabolite (Kell et al., 2007). Notably, we found that knockdown of *gcn-2* partially  
291 suppressed SKN-1 activation in *amdh-1* mutants. *gcn-2* is a conserved protein kinase which  
292 functions in the integrated stress response (ISR) (Pakos-Zebrucka et al., 2016). Interestingly, the  
293 homolog of SKN-1, NRF2, has known functions in regulating the transcription of ATF4, the core  
294 effector of the ISR, in mammals (Pakos-Zebrucka et al., 2016). Moreover the *gcn-2* inhibitor,  
295 *impt-1*, extends the lifespan of *C. elegans* and requires SKN-1, highlighting potential interactions

296 between *gcn-2*, the ISR and SKN-1. Further studies are needed to determine the entirety of the  
297 signaling cascade that culminates in the activation of SKN-1 upon metabolic perturbations, as the  
298 partial dependence of *gcn-2* suggests other factors are involved. Interestingly, we identified *suco-*  
299 *I* as a suppressor of SKN-1 activation in *amdh-1* mutants. *suco-1* is a homolog of the SLP1  
300 protein in yeast, which is hypothesized to participate in protecting nascent proteins from  
301 degradation during folding in the ER (Zhang et al., 2017). Previous work has identified UPR<sup>ER</sup>  
302 components such as *ire-1* and *hsp-4* in the transcriptional response to oxidants arsenite and  
303 tBOOH (Glover-Cutter et al., 2013). If *suco-1* functions in a similar capacity in *C. elegans* as it  
304 does in yeast, this could implicate other ER protein homeostasis pathways in the regulation of  
305 SKN-1. Indeed, an ER-associated isoform of SKN-1, SKN-1A, is known to be a monitor of  
306 proteasome function and may modulate crosstalk between the ER and SKN-1 (Lehrbach et al.,  
307 2017)

### 308 **Activation of SKN-1 initiates a physiological trade off**

309 Titration of SKN-1 expression is important for the pro-longevity nature of this transcription  
310 factor. Moderate overexpression of SKN-1 or mutation of the negative regulator *wdr-23* extends  
311 the lifespan of *C. elegans*, while hypomorphic mutants or worms treated with *skn-1* RNAi  
312 exhibit a shortened lifespan (Grushko et al., 2021; Ganner et al., 2019; Tullet et al., 2017; Tang  
313 and Choe, 2015; Tullet et al., 2008). However, gain-of-function animals with constitutive  
314 expression of SKN-1 and animals containing high-copy arrays of SKN-1 exhibit a mild decrease  
315 in lifespan (Paek et al., 2012; Tullet et al., 2008). Additionally, activation of SKN-1 is beneficial  
316 for oxidative stress survival while detrimental to survival under other conditions such as heat, ER  
317 or mitochondrial stress (Deng et al., 2020). SKN-1 activation upon metabolic perturbation, as  
318 shown here, provides short term benefit to survive oxidative stress but comes at the cost of

319 sensitivity to heat and ER stress. This may represent a physiological trade off, where SKN-1  
320 prioritizes the allocation of cellular resources to defend against a perceived threat at the cost of  
321 sensitivity to other perturbations. Identification and study of the physiologically relevant  
322 consequences of SKN-1 activation will be crucial to understanding how modulation of this  
323 master transcription factor may be leveraged to affect human disease.

## 324 **AUTHOR CONTRIBUTIONS**

325 PAF designed and executed experiments and wrote the manuscript. RHS executed early  
326 experiments and intellectually contributed to project design/execution. TS and TB executed  
327 stress response reporter experiments. RBZ assisted with RNA-sequencing analysis. HKG and HZ  
328 assisted with early experiments crucial to the direction of the project. AD provided funding and  
329 substantial intellectual support. All authors assisted with the editing of the manuscript.

## 330 **ACKNOWLEDGEMENTS**

331 We thank Larry Joe for NGS library preparation. We thank all Dillin lab members for useful  
332 discussion throughout the project and feedback on the manuscript. We also would like to thank  
333 Dr. Robert Bender (University of Michigan) for thoughtful discussions throughout the project.  
334 This work was supported by the following grants: PAF was supported by 4T32GM007232-40  
335 through the NIH. R.H.S is supported by 4R00AG065200-03 through the NIA. R.B.Z. is  
336 supported by the Larry L. Hillblom Foundation Fellowship 2019-A-023-FEL. HKG is supported  
337 by NSF Grant # DGE175814 and NIA 1F99AG068343-01. H.Z. is supported by the Larry L.  
338 Hillblom Foundation Fellowship 2020-A-018-FEL. This work used the Vincent J. Coates  
339 Genomics Sequencing Laboratory at UC Berkeley, supported by NIH S10 OD018174  
340 Instrumentation Grant. AD and the lab are funded by R01ES021667 and R01AG059566 from the



341 NIH and the Howard Hughes Medical Institute. Some strains were provided by the CGC, which  
342 is funded by NIH Office of Research Infrastructure Programs (P40 OD010440).

### 343 **DECLARATION OF INTERESTS**

344 No competing interests to declare.

### 345 **DATA AND AVAILABILITY**

346 The raw RNA-seq data were uploaded to the NCBI short read archive (PRJNA801069). Access  
347 for reviewers is available at

348 <https://dataview.ncbi.nlm.nih.gov/object/PRJNA801069?reviewer=nchldc4t4gjac3ff5rr3k8g7rn>.

349

### 350 **METHODS**

#### 351 **Strain List**

| <u>Strain</u>                                                                         | <u>SOURCE</u>                                      | <u>IDENTIFIER</u> |
|---------------------------------------------------------------------------------------|----------------------------------------------------|-------------------|
| <i>C. elegans</i> : strain N2 (Bristol)                                               | CGC                                                | N2                |
| <i>C. elegans</i> : strain LD1171: ldIs3 [gcs-1p::GFP + rol-6(su1006)]                | CGC                                                | LD1171            |
| <i>C. elegans</i> : strain CL2166: dvIs19[pAG15(gst-4p::GFP::NLS)] III                | CGC                                                | CL2166            |
| <i>C. elegans</i> : strain AM446: rmIs223[pC12C8.1::GFP; rol-6(su1006) II]            | Gift from Morimoto lab (Morley and Morimoto, 2004) | AM446             |
| <i>C. elegans</i> : strain AGD3126: zcIs13[hsp-6p::GFP]                               | This paper                                         | AGD3126           |
| <i>C. elegans</i> : strain AGD3111: dvIs19[pAG15(gst-4p::GFP::NLS)] III; sek-1(km4) X | This paper                                         | AGD3111           |
| <i>C. elegans</i> : strain AGD3013: uth93 ; <i>amdh-1</i> (uth29)III;                 | This paper                                         | AGD3013           |

|                                                                                                                                          |            |         |
|------------------------------------------------------------------------------------------------------------------------------------------|------------|---------|
| dvIs19[pAG15(gst-4p::GFP::NLS)]; uthEx967[haly-1p::haly-1::haly-1 3' UTR, myo-3p::mCherry]                                               |            |         |
| <i>C. elegans</i> : strain AGD2530: uth93 ; <i>amdh-1</i> (uth29)III; dvIs19[pAG15(gst-4p::GFP::NLS)]                                    | This paper | AGD2530 |
| <i>C. elegans</i> : strain AGD2529: uth92 ; <i>amdh-1</i> (uth29)III; dvIs19[pAG15(gst-4p::GFP::NLS)]                                    | This paper | AGD2529 |
| <i>C. elegans</i> : strain AGD2432: pmk-1(km25) IV; dvIs19[pAF15(gst-4p::GFP::NLS)]                                                      | This paper | AGD2432 |
| <i>C. elegans</i> : strain AGD2307: <i>amdh-1</i> (uth29)III; dvIs19[pAG15(gst-4p::GFP::NLS)]                                            | This paper | AGD2307 |
| <i>C. elegans</i> : strain AGD2306: <i>amdh-1</i> (uth29)III; <i>rmIs223</i> [ <i>pC12C8.1::GFP</i> ; <i>rol-6</i> ( <i>su1006</i> ) II] | This paper | AGD2306 |
| <i>C. elegans</i> : strain AGD2053: <i>zcls4</i> [ <i>hsp-4p::GFP</i> ]V (SJ4005 5x backcross)                                           | This paper | AGD2053 |
| <i>C. elegans</i> : strain AGD1848: <i>amdh-1</i> (uth29)III                                                                             | This paper | AGD1848 |

352

353 ***C. elegans* maintenance**

354 All *C. elegans* strains were maintained at 15°C on NGM plates with OP50 *E. coli* B strain. All  
355 experiments were performed at 20°C on RNAi plates (NGM agar, 1 mM IPTG, 100 µg/mL  
356 carbenicillin) with HT115 *E. coli* K12 strain bacteria containing the RNAi plasmid pL4440  
357 empty vector as a negative control (EV) or containing sequence to synthesize a double-stranded  
358 RNA against a target gene unless otherwise stated. All RNAi constructs were isolated from the  
359 Vidal or Ahringer RNAi library and sequence verified before using. For all experiments, eggs  
360 were obtained using a standard bleaching protocol (1.8% sodium hypochlorite and 0.375 M  
361 KOH) and arrested at the L1 stage overnight in M9 (22 mM KH<sub>2</sub>PO<sub>4</sub> monobasic, 42.3 mM  
362 Na<sub>2</sub>HPO<sub>4</sub>, 85.6mM NaCl, 1 mM MgSO<sub>4</sub>) without food for synchronization. The next day,  
363 synchronized L1 animals were placed on HT115 bacteria and grown until day 1 of adulthood.

364 For histidine supplementation experiments, plates were supplemented with 10mM histidine that  
365 was buffered with HCl to pH 7.0. Animals were grown on histidine supplemented plates after L1  
366 synchronization for the duration of the entire experiment.

367 *haly-1* rescue experiments were performed using a ~4.3kb amplicon from the genomic DNA of  
368 N2 (bristol) animals to include a putative promoter region (~1.1 kb) and complete CDS (~2.6kb,  
369 including introns) flanked on each side by the endogenous 5' and 3' UTRs as annotated by  
370 wormbase (~0.3kb each). This amplicon was generated in a standard PCR reaction using N2  
371 genomic DNA with the forward primer oPF388 (5' - ttgtccaataaacctttgtcc - 3') and reverse  
372 primer oPF389 (5' -tccatataaccctgtaactcc - 3') and sequenced verified using standard Sanger  
373 sequencing after PCR purification. Array positive animals were generated by injecting *haly-*  
374 *1(uth92)* or *haly-1(uth93)* animals with purified amplicon at 40 ng/ $\mu$ L along with a co-injection  
375 marker (*myo-3p::mCherry*) at 5 ng/ $\mu$ L. Two independent arrays were isolated from different  
376 parent animals for each *haly-1* mutant allele.

### 377 **Lifespan and Stress Assays**

378 Lifespan measurements were assessed on RNAi plates (standard NGM agar supplemented with  
379 1mM IPTG and 100ug/mL carbenicillin) with HT115 bacteria carrying pL4440 empty vector  
380 RNAi. Worms were synchronized by standard bleaching/L1 arresting as described and kept at  
381 20°C throughout the duration of the experiment. Adult worms were moved away from progeny  
382 onto fresh plates for the first 5-7 days until progeny were no longer visible and scored every 1 to  
383 2 days until all animals were scored. Animals with bagging, vulval explosions, or other age-  
384 unrelated deaths were censored and removed from quantification. For tunicamycin survival  
385 assays, animals were moved onto tunicamycin (25 ng/ $\mu$ L) or 1% DMSO plates at D1 of adulthood

386 and scored as described for standard lifespan measurements. For thermotolerance, worms were  
387 synchronized by bleaching as described above, L1 arrested, and plated on RNAi plates with  
388 HT115 bacteria carrying pL4440 empty vector or other RNAi. At D1, 15-20 worms per plate  
389 with 3-4 plates per condition were exposed to 34°C heat via incubator for 14-15 hours. Plates  
390 were then removed from the incubator and manually assessed for movement and pharyngeal  
391 pumping, using light head taps where necessary, to determine survival. Worms that displayed  
392 internal hatching (bagging) or crawled onto the side of the plate and desiccated were censored  
393 and omitted from the final analysis. Percent alive was calculated using the number of living  
394 worms divided by the total number of worms excluding censored animals for each strain. For  
395 oxidative stress survival, worms were bleach synchronized, L1 arrested, and plated on RNAi  
396 plates with HT115 bacteria carrying empty vector or *daf-2* RNAi. At D1, ~100 animals per  
397 condition were transferred to 4-5 NGM plates containing 7.5mM t-booh (Luperox TBH70X,  
398 Sigma). Worms were scored for survival every 2 hours, starting at 12 hours, until the 16 hour  
399 time point.

#### 400 **Fluorescence imaging and quantification**

401 Image acquisition was performed as previously described (Bar-Ziv et al., 2020). Briefly, day 1  
402 animals were picked under a standard dissection microscope onto a solid NGM plate that  
403 contained a ~15µL drop of 100 nM sodium azide. Immobilized worms were aligned head to tail  
404 and images were captured on an Echo Revolve R4 microscope equipped with an Olympus 4x  
405 Plan Fluorite NA 0.13 objective lens, a standard Olympus FITC filter (ex 470/40; em 525/50;  
406 DM 560), and an iPad Pro for the camera and to drive the ECHO software.

407 To quantify fluorescence, a COPAS large particle biosorter was used as previously described  
408 (Bar-Ziv et al., 2020). Data were collected gating for size (time of flight [TOF] and extinction) to  
409 exclude eggs and most L1 animals. Data were processed by censoring events that reached the  
410 maximum peak height for Green or Extinction measurements (PH Green, PH Ext = 65532) and  
411 censoring events < 300 TOF to exclude any remaining L1 animals. For the reporters with low  
412 basal fluorescence (AGD2053, AGD3126), data > 0 were included. For reporter strains with  
413 visible basal fluorescence (CL2166, AGD2307), data >= 10 were included for subsequent  
414 statistical analysis. All fluorescence data were normalized to TOF to account for worm size. For  
415 all *amdh-1(uth29)* mutant experiments, ‘SKN-1 activation’ was quantified by normalizing  
416 Green/TOF value for each mutant to the median of the wildtype population for each condition.  
417 For the MAPK mutant experiments (fig. 2a), ‘SKN-1 activation’ was quantified by normalizing  
418 the Green/TOF value for each mutant fed *amdh-1* RNAi to the median of that mutant fed EV  
419 RNAi. All data is plotted as log(FC) SKN-1 activation.

#### 420 **RNA isolation, sequencing and analysis**

421 Animals were bleach synchronized and grown to Day1 adulthood on empty vector RNAi plates.  
422 At least 2,000 animals per condition per replicate were washed off plates using M9 and  
423 collected. After a 30 second spin down at 1,000 RCF, M9 was aspirated, replaced with 1mL  
424 Trizol, and the tube was immediately frozen in liquid nitrogen to be stored at -80°C for  
425 downstream processing. RNA was harvested after 3 freeze thaw cycles in liquid nitrogen/37°C  
426 water bath. After the final thaw, 200µL (1:5 chloroform:Trizol) of chloroform were added to the  
427 sample, vortexed, and the aqueous phase was collected after centrifugation in a gel phase lock  
428 tube. RNA was isolated from the obtained aqueous phase using a Qiagen RNeasy MiniKit  
429 according to manufacturer's directions. Library preparation was performed using Kapa

430 Biosystems mRNA Hyper Prep Kit (Roche, product number KK8581) using dual index adapters  
431 (KAPA, product number KK8722). Sequencing was performed using Illumina HS4000, mode  
432 SR100, through the Vincent J. Coates Genomic Sequencing Core at University of California,  
433 Berkeley.

434  
435 For RNA-seq analysis of *amdh-1(uth29)* mutants, the raw sequencing data were uploaded to the  
436 Galaxy project web platform and the public server at [usegalaxy.org](http://usegalaxy.org) was used to analyze the data  
437 (Afgan et al., 2016). Paired end reads were aligned using the Kallisto quant tool (Version 0.46.0)  
438 with WBcel235 as the reference genome. Fold changes and statistics were generated using the  
439 DESeq2 tool with Kallisto quant count files as the input. Volcano plots were generated using the  
440 GraphPad Prism version 8.0.0 for Windows (GraphPad Software, San Diego, California USA,  
441 [www.graphpad.com](http://www.graphpad.com)) on the fold change and adjusted-p values generated by the DESeq2 analysis  
442 (table s1). For analysis of previously published data, raw reads were downloaded from the Gene  
443 Expression Omnibus (GEO), (Accession: GSE123531 and GSE63075) and analyzed as  
444 described above.

445

#### 446 **EMS mutagenesis screen to find suppressors of SKN-1 activation**

447 *amdh-1(uth29); gst-4p::GFP::NLS* (strain AGD2307) were mutagenized to find suppressors of  
448 *gst-4p::GFP* signal. Briefly, ~150 L4 animals were picked into a 1.5mL eppendorf tube  
449 containing 1mL M9 buffer and spun down at 1,000 RPM for 1 minute. The M9 was aspirated  
450 from the tube and replaced with 1mL fresh M9 and spun again. To the washed worm pellet, 5 $\mu$ L  
451 of EMS was added, the tube was parafilm and left nutating at 20C for 4 hours. After  
452 incubation, the worms were spun down and rinsed 4 times with 1mL M9. Waste was collected

453 and neutralized with 1:1 KOH before discarding. Rinsed, mutagenized, worms were plated  
454 overnight. The next day, mutagenized worms were picked onto 10 large plates seeded with OP50  
455 bacteria, 10 per plate, and allowed to lay eggs for 24 hours. Three days later, adult F1 animals  
456 were bleached and plated onto fresh large plates. F2 mutants were screened for suppression of  
457 *gst-4p::GFP* under a fluorescent microscope compared to age matched, un-mutagenized, control  
458 animals.

459 Genomic DNA was extracted from mutants of interest using the Puregene Cell and Tissue Kit  
460 (Qiagen), as previously described (Lehrbach et al., 2017). 2ug of purified DNA was sheared  
461 using a Covaris S220 focused-ultrasonicator to produce ~400 bp fragments. Library preparation  
462 was performed with 1ug of sheared DNA using Kapa Biosystems Hyper Prep Kit (Roche,  
463 product number KK8504) dual index adapters (KAPA, product number KK8727). Sequencing  
464 was performed using the Illumina NovaSeq6000 platform through the Vincent J. Coates  
465 Genomic Sequencing Core at University of California, Berkeley. Raw reads were uploaded to  
466 the Galaxy project web platform and the public server at usegalaxy.org was used to analyze the  
467 data (Afgan et al., 2016). Reads were aligned using the Bowtie2 tool with WBcel235/ce11 as the  
468 reference genome. The MiModD tool suite (Baumeister lab) was used on the Variant Allele  
469 Contrast (VAC) mapping mode to call, extract and filter variants to compare mutants to the  
470 parental, un-mutagenized strain. Causative genes were identified through a combination of  
471 genetic complementation, deep sequencing and RNAi phenocopy experiments.

472

473

474

475

## REFERENCES

1. Afgan, E., Baker, D., van den Beek, M., Blankenberg, D., Bouvier, D., Čech, M., Chilton, J., Clements, D., Coraor, N., Eberhard, C., et al. (2016). The Galaxy platform for accessible, reproducible and collaborative biomedical analyses: 2016 update. *Nucleic Acids Res* *44*, W3–W10.
2. Bar-Ziv, R., Frakes, A.E., Higuchi-Sanabria, R., Bolas, T., Frankino, P.A., Gildea, H.K., Metcalf, M.G., and Dillin, A. (2020). Measurements of Physiological Stress Responses in *C. Elegans*. *JoVE (Journal of Visualized Experiments)* e61001.
3. Bender, R.A. (2012). Regulation of the histidine utilization (*hut*) system in bacteria. *Microbiol. Mol. Biol. Rev.* *76*, 565–584.
4. Blackwell, T.K., Steinbaugh, M.J., Hourihan, J.M., Ewald, C.Y., and Isik, M. (2015). SKN-1/Nrf, stress responses, and aging in *Caenorhabditis elegans*. *Free Radic Biol Med* *88*, 290–301.
5. Bowerman, B., Eaton, B.A., and Priess, J.R. (1992). *skn-1*, a maternally expressed gene required to specify the fate of ventral blastomeres in the early *C. elegans* embryo. *Cell* *68*, 1061–1075.
6. Bowser Revel, H.R., and Magasanik, B. (1958). The Enzymatic Degradation of Urocanic Acid. *Journal of Biological Chemistry* *233*, 930–935.
7. Boylan, S.A., and Bender, R.A. (1984). Genetic and physical maps of *Klebsiella aerogenes* genes for histidine utilization (*hut*). *Molec. Gen. Genet.* *193*, 99–103.
8. Calvo, A.C., Pey, A.L., Ying, M., Loer, C.M., and Martinez, A. (2008). Anabolic function of phenylalanine hydroxylase in *Caenorhabditis elegans*. *The FASEB Journal* *22*, 3046–3058.
9. Chong, S., Dugast-Darzacq, C., Liu, Z., Dong, P., Dailey, G.M., Cattoglio, C., Heckert, A., Banala, S., Lavis, L., Darzacq, X., et al. (2018). Imaging dynamic and selective low-complexity domain interactions that control gene transcription. *Science* eaar2555.
10. Crombie, T.A., Tang, L., Choe, K.P., and Julian, D. (2016). Inhibition of the oxidative stress response by heat stress in *Caenorhabditis elegans*. *Journal of Experimental Biology* jeb.135327.
11. DeBerardinis, R.J., and Thompson, C.B. (2012). Cellular metabolism and disease: what do metabolic outliers teach us? *Cell* *148*, 1132–1144.
12. Deng, J., Dai, Y., Tang, H., and Pang, S. (2020). SKN-1 Is a Negative Regulator of DAF-16 and Somatic Stress Resistance in *Caenorhabditis elegans*. *G3: Genes, Genomes, Genetics* *10*, 1707–1712.
13. Edwards, C., Canfield, J., Copes, N., Brito, A., Rehan, M., Lipps, D., Brunquell, J., Westerheide, S.D., and Bradshaw, P.C. (2015). Mechanisms of amino acid-mediated lifespan extension in *Caenorhabditis elegans*. *BMC Genetics* *16*, 8.
14. Efeyan, A., Comb, W.C., and Sabatini, D.M. (2015). Nutrient Sensing Mechanisms and Pathways. *Nature* *517*, 302–310.
15. Ferguson, A.A., Springer, M.G., and Fisher, A.L. (2010). *skn-1*-Dependent and -Independent Regulation of *aip-1* Expression following Metabolic Stress in *Caenorhabditis elegans*. *Molecular and Cellular Biology*.
16. Fisher, A.L., Page, K.E., Lithgow, G.J., and Nash, L. (2008). The *Caenorhabditis elegans* K10C2.4 Gene Encodes a Member of the Fumarylacetoacetate Hydrolase Family. *J Biol Chem* *283*, 9127–9135.
17. Ganner, A., Gerber, J., Ziegler, A.-K., Li, Y., Kandzia, J., Matulenski, T., Kreis, S., Breves, G., Klein, M., Walz, G., et al. (2019). CBP-1/p300 acetyltransferase regulates SKN-1/Nrf cellular levels, nuclear localization, and activity in *C. elegans*. *Experimental Gerontology* *126*, 110690.
18. Glover-Cutter, K.M., Lin, S., and Blackwell, T.K. (2013). Integration of the Unfolded



- Protein and Oxidative Stress Responses through SKN-1/Nrf. *PLoS Genet* 9, e1003701.
19. Goh, G.Y.S., Martelli, K.L., Parhar, K.S., Kwong, A.W.L., Wong, M.A., Mah, A., Hou, N.S., and Taubert, S. (2014). The conserved Mediator subunit MDT-15 is required for oxidative stress responses in *Caenorhabditis elegans*. *Aging Cell* 13, 70–79.
  20. Goh, G.Y.S., Winter, J.J., Bhanshali, F., Doering, K.R.S., Lai, R., Lee, K., Veal, E.A., and Taubert, S. (2018). NHR-49/HNF4 integrates regulation of fatty acid metabolism with a protective transcriptional response to oxidative stress and fasting. *Aging Cell* 17, e12743.
  21. Grushko, D., Boocholez, H., Levine, A., and Cohen, E. (2021). Temporal requirements of SKN-1/NRF as a regulator of lifespan and proteostasis in *Caenorhabditis elegans*. *PLOS ONE* 16, e0243522.
  22. Holeček, M. (2020). Histidine in Health and Disease: Metabolism, Physiological Importance, and Use as a Supplement. *Nutrients* 12, 848.
  23. Hu, Q., D'Amora, D.R., MacNeil, L.T., Walhout, A.J.M., and Kubiseski, T.J. (2017). The Oxidative Stress Response in *Caenorhabditis elegans* Requires the GATA Transcription Factor ELT-3 and SKN-1/Nrf2. *Genetics* 206, 1909–1922.
  24. Inoue, H., Hisamoto, N., An, J.H., Oliveira, R.P., Nishida, E., Blackwell, T.K., and Matsumoto, K. (2005). The *C. elegans* p38 MAPK pathway regulates nuclear localization of the transcription factor SKN-1 in oxidative stress response. *Genes Dev* 19, 2278–2283.
  25. Kanarek, N., Keys, H.R., Cantor, J.R., Lewis, C.A., Chan, S.H., Kunchok, T., Abu-Remaileh, M., Freinkman, E., Schweitzer, L.D., and Sabatini, D.M. (2018). Histidine catabolism is a major determinant of methotrexate sensitivity. *Nature* 559, 632–636.
  26. Kell, A., Ventura, N., Kahn, N., and Johnson, T.E. (2007). Activation of SKN-1 by novel kinases in *Caenorhabditis elegans*. *Free Radic Biol Med* 43, 1560–1566.
  27. Lehrbach, N.J., Ji, F., and Sadreyev, R. (2017). Next-Generation Sequencing for Identification of EMS-Induced Mutations in *Caenorhabditis elegans*. *Curr Protoc Mol Biol* 117, 7.29.1-7.29.12.
  28. Link, C.D., and Johnson, C.J. (2002). [42] - Reporter Transgenes for Study of Oxidant Stress in *Caenorhabditis elegans*. In *Methods in Enzymology*, C.K. Sen, and L. Packer, eds. (Academic Press), pp. 497–505.
  29. Martínez-Reyes, I., and Chandel, N.S. (2020). Mitochondrial TCA cycle metabolites control physiology and disease. *Nat Commun* 11, 102.
  30. McGaha, T.L., Huang, L., Lemos, H., Metz, R., Mautino, M., Prendergast, G.C., and Mellor, A.L. (2012). Amino acid catabolism: a pivotal regulator of innate and adaptive immunity. *Immunol Rev* 249, 135–157.
  31. Molinaro, A., Bel Lassen, P., Henricsson, M., Wu, H., Adriouch, S., Belda, E., Chakaroun, R., Nielsen, T., Bergh, P.-O., Rouault, C., et al. (2020). Imidazole propionate is increased in diabetes and associated with dietary patterns and altered microbial ecology. *Nat Commun* 11, 5881.
  32. Morley, J.F., and Morimoto, R.I. (2004). Regulation of Longevity in *Caenorhabditis elegans* by Heat Shock Factor and Molecular Chaperones. *Mol. Biol. Cell* 15, 657–664.
  33. Nhan, J.D., Turner, C.D., Anderson, S.M., Yen, C.-A., Dalton, H.M., Cheesman, H.K., Ruter, D.L., Uma Naresh, N., Haynes, C.M., Soukas, A.A., et al. (2019). Redirection of SKN-1 abates the negative metabolic outcomes of a perceived pathogen infection. *Proc Natl Acad Sci U S A* 116, 22322–22330.
  34. Niwa, T., Katsuzaki, T., Miyazaki, S., Miyazaki, T., Ishizaki, Y., Hayase, F., Tatemichi, N., and Takei, Y. (1997). Immunohistochemical detection of imidazolone, a novel advanced glycation end product, in kidneys and aortas of diabetic patients. *J Clin Invest* 99, 1272–1280.
  35. Nolfi-Donagan, D., Braganza, A., and Shiva, S. (2020). Mitochondrial electron transport

- chain: Oxidative phosphorylation, oxidant production, and methods of measurement. *Redox Biol* 37, 101674.
36. Omar, A.M., Abdelghany, T.M., Abdel-Bakky, M.S., Alahdal, A.M., Radwan, M.F., and El-Araby, M.E. (2018). Design, Synthesis and Antiproliferative Activities of Oxidative Stress Inducers Based on 2-Styryl-3,5-dihydro-4H-imidazol-4-one Scaffold. *Chemical and Pharmaceutical Bulletin* 66, 967–975.
  37. Paek, J., Lo, J.Y., Narasimhan, S.D., Nguyen, T.N., Glover-Cutter, K., Robida-Stubbs, S., Suzuki, T., Yamamoto, M., Blackwell, T.K., and Curran, S.P. (2012). Mitochondrial SKN-1/Nrf Mediates a Conserved Starvation Response. *Cell Metab* 16, 526–537.
  38. Pakos-Zebrucka, K., Koryga, I., Mnich, K., Ljubic, M., Samali, A., and Gorman, A.M. (2016). The integrated stress response. *EMBO Rep* 17, 1374–1395.
  39. Pang, S., Lynn, D.A., Lo, J.Y., Paek, J., and Curran, S.P. (2014). SKN-1 and Nrf2 couples proline catabolism with lipid metabolism during nutrient deprivation. *Nat Commun* 5, 1–8.
  40. Rao, D.R., and Greenberg, D.M. (1961). Studies on the Enzymic Decomposition of Urocanic Acid: IV. PURIFICATION AND PROPERTIES OF 4(5)-IMIDAZOLONE-5(4)-PROPIONIC ACID HYDROLASE. *Journal of Biological Chemistry* 236, 1758–1763.
  41. Ravichandran, M., Priebe, S., Grigolon, G., Rozanov, L., Groth, M., Laube, B., Guthke, R., Platzer, M., Zarse, K., and Ristow, M. (2018). Impairing L-Threonine Catabolism Promotes Healthspan through Methylglyoxal-Mediated Proteohormesis. *Cell Metabolism* 27, 914-925.e5.
  42. Steinbaugh, M.J., Narasimhan, S.D., Robida-Stubbs, S., Moronetti Mazzeo, L.E., Dreyfuss, J.M., Hourihan, J.M., Raghavan, P., Operaña, T.N., Esmailie, R., and Blackwell, T.K. Lipid-mediated regulation of SKN-1/Nrf in response to germ cell absence. *ELife* 4, e07836.
  43. Tang, H., and Pang, S. (2016). Proline Catabolism Modulates Innate Immunity in *Caenorhabditis elegans*. *Cell Reports* 17, 2837–2844.
  44. Tang, L., and Choe, K.P. (2015). Characterization of *skn-1/wdr-23* phenotypes in *Caenorhabditis elegans*; pleiotrophy, aging, glutathione, and interactions with other longevity pathways. *Mechanisms of Ageing and Development* 149, 88–98.
  45. Tullet, J.M.A., Hertweck, M., Hyung An, J., Baker, J., Hwang, J.Y., Liu, S., Oliveira, R.P., Baumeister, R., and Blackwell, T.K. (2008). Direct inhibition of the longevity promoting factor SKN-1 by Insulin-like signaling in *C. elegans*. *Cell* 132, 1025–1038.
  46. Tullet, J.M.A., Green, J.W., Au, C., Benedetto, A., Thompson, M.A., Clark, E., Gilliat, A.F., Young, A., Schmeisser, K., and Gems, D. (2017). The SKN-1/Nrf2 transcription factor can protect against oxidative stress and increase lifespan in *C. elegans* by distinct mechanisms. *Aging Cell* 16, 1191–1194.
  47. Wang, J., Robida-Stubbs, S., Tullet, J.M.A., Rual, J.-F., Vidal, M., and Blackwell, T.K. (2010). RNAi Screening Implicates a SKN-1–Dependent Transcriptional Response in Stress Resistance and Longevity Deriving from Translation Inhibition. *PLOS Genetics* 6, e1001048.
  48. Wu, C.-W., Deonaraine, A., Przybysz, A., Strange, K., and Choe, K.P. (2016). The Skp1 Homologs SKR-1/2 Are Required for the *Caenorhabditis elegans* SKN-1 Antioxidant/Detoxification Response Independently of p38 MAPK. *PLoS Genet* 12, e1006361.
  49. Zhang, S., Xu, C., Larrimore, K.E., and Ng, D.T.W. (2017). Slp1-Emp65: A Guardian Factor that Protects Folding Polypeptides from Promiscuous Degradation. *Cell* 171, 346-357.e12.

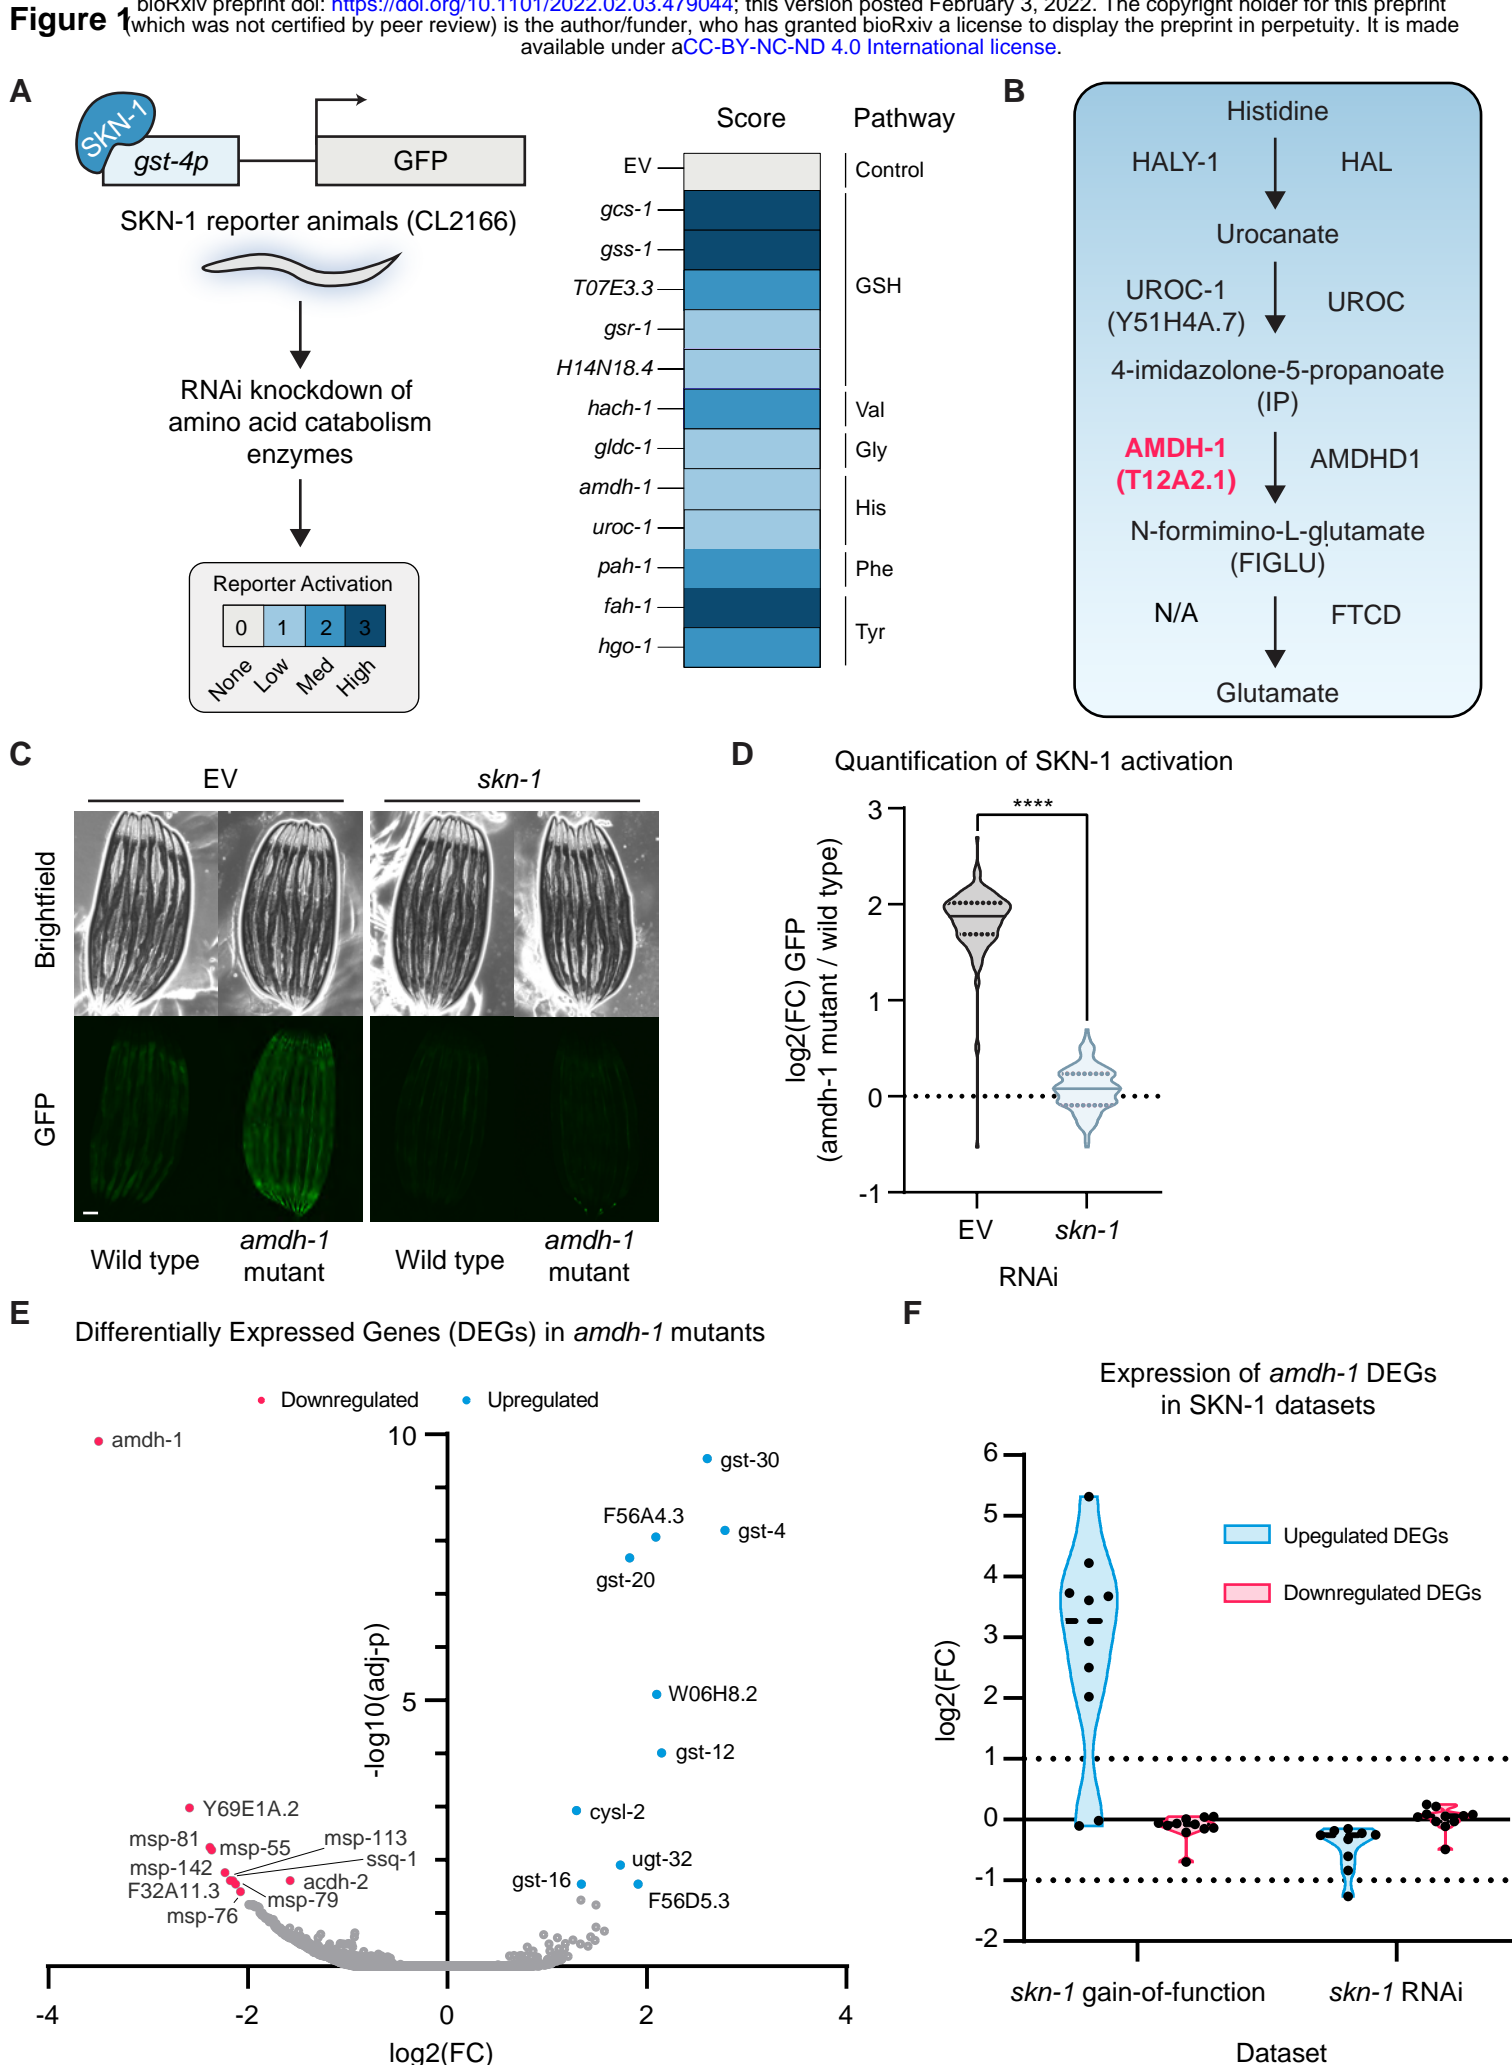

476

## 477 **FIGURE LEGENDS**

### 478 **Figure 1. Perturbation of histidine catabolism activates a SKN-1 mediated detoxification** 479 **response**

480 (A) Experimental scheme of RNAi screen to uncover amino acid catabolism enzymes that affect  
481 SKN-1 activation (left), and scores of tested genes (right). RNAi knockdown of genes that  
482 suppressed the reporter were scored but not included (table 1). (B) Enzymes and intermediates  
483 involved in the histidine catabolism pathway, in *C. elegans* (left) and humans (right) (“N/A”  
484 represents no identified *C. elegans* enzyme for this step). (C) Fluorescent images of SKN-1  
485 transcriptional reporter, *gst-4p::GFP*, in wildtype or mutant backgrounds on RNAi Scale bar,  
486 100  $\mu\text{m}$  (D) Quantification of SKN-1 activation (*amdh-1* mutant normalized to median of wild  
487 type) from (C), Data are representative of  $n = 3$  biological replicates,  $n > 121$  animals per  
488 replicate, \*\*\*\* =  $P < 0.0001$  using a Mann-Whitney two-tailed test. (E) Volcano plot of genes in  
489 *amdh-1(uth29)* compared to N2 wildtype control. Differentially expressed genes (DEGs) shown  
490 in red (downregulated) and blue (upregulated), adjusted- $p < 0.05$  (F) Meta analysis of DEGS  
491 from *amdh-1(uth29)* mutants in gain of function *skn-1(lax188)* and *skn-1* RNAi datasets (Nhan et  
492 al., 2019; Steinbaugh et al.).

493

494

495

496

**Figure 2**

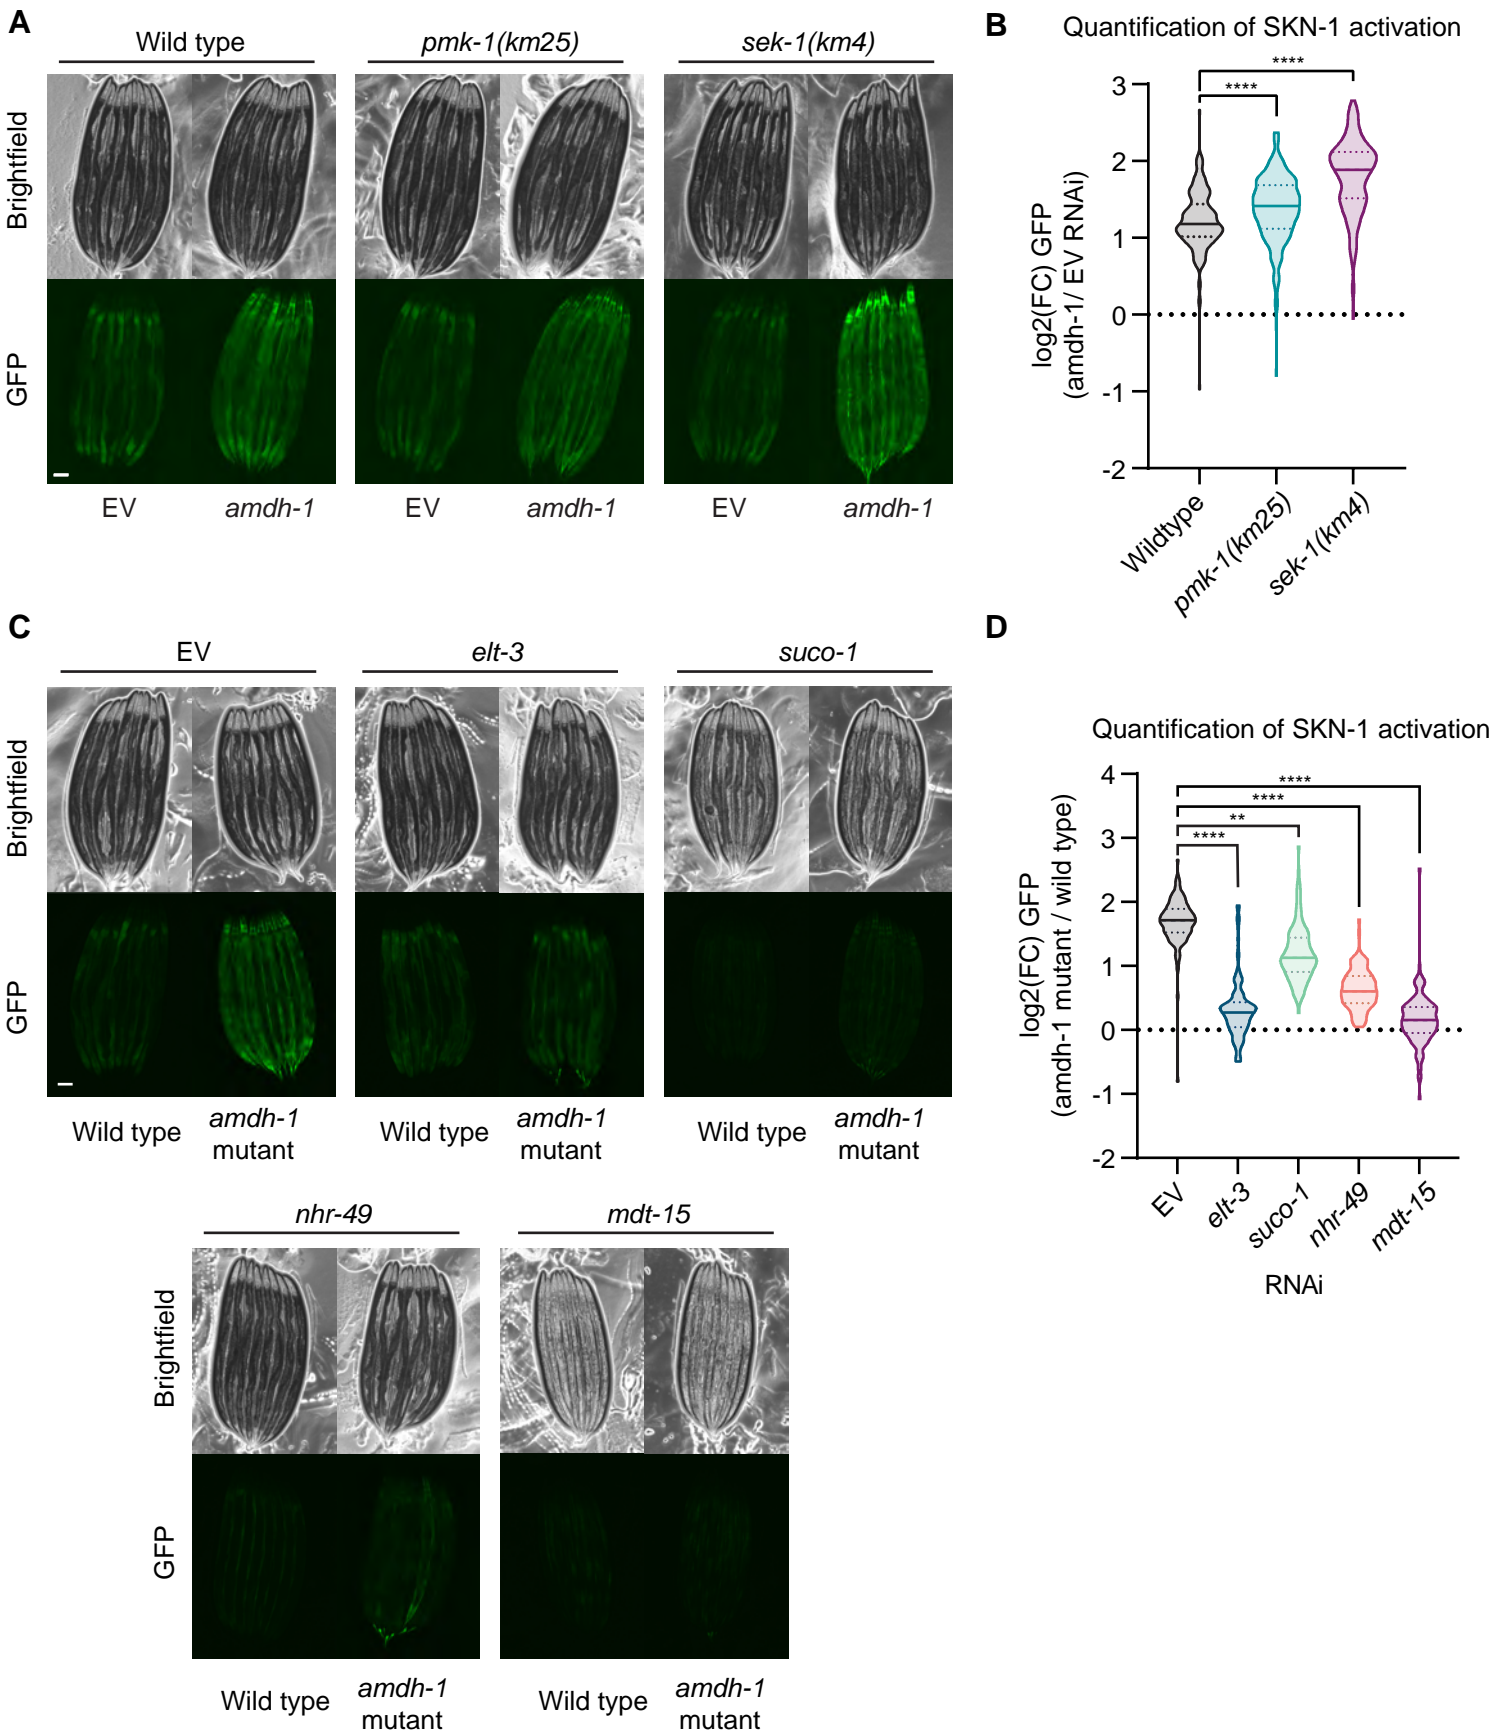

497 **Figure 2. Genetic requirements of SKN-1 activation upon perturbation of histidine**  
498 **catabolism**

499 (A) Fluorescent images of SKN-1 reporter animals in a wildtype, *sek-1(km4)* or *pmk-1(km25)*  
500 mutant animals fed *amdh-1* RNAi. Scale bar, 100  $\mu$ m. (B) Quantification of SKN-1 activation  
501 (*amdh-1* RNAi normalized to median of EV) from (A), Data shown are representative of n = 3  
502 biological replicates with n > 172 animals per condition for each replicate. \*\*\*\* = P < 0.0001  
503 using a one-way ANOVA. (C) Fluorescent images of SKN-1 reporter animals in a wildtype or  
504 *amdh-1(uth29)* mutant background fed RNAi targeting *elt-3*, *suco-1*, *nhr-49*, and *mdt-15*. Scale  
505 bar, 100  $\mu$ m. (D) Quantification of SKN-1 activation (*amdh-1* mutant normalized to median of  
506 wild type) from (C), Data shown are representative of n = 3 biological replicates with n > 88  
507 animals per condition for each replicate. \*\* = P < 0.01, \*\*\*\* = P < 0.0001 using a one-way  
508 ANOVA.

509

510

511

512

513

514

515

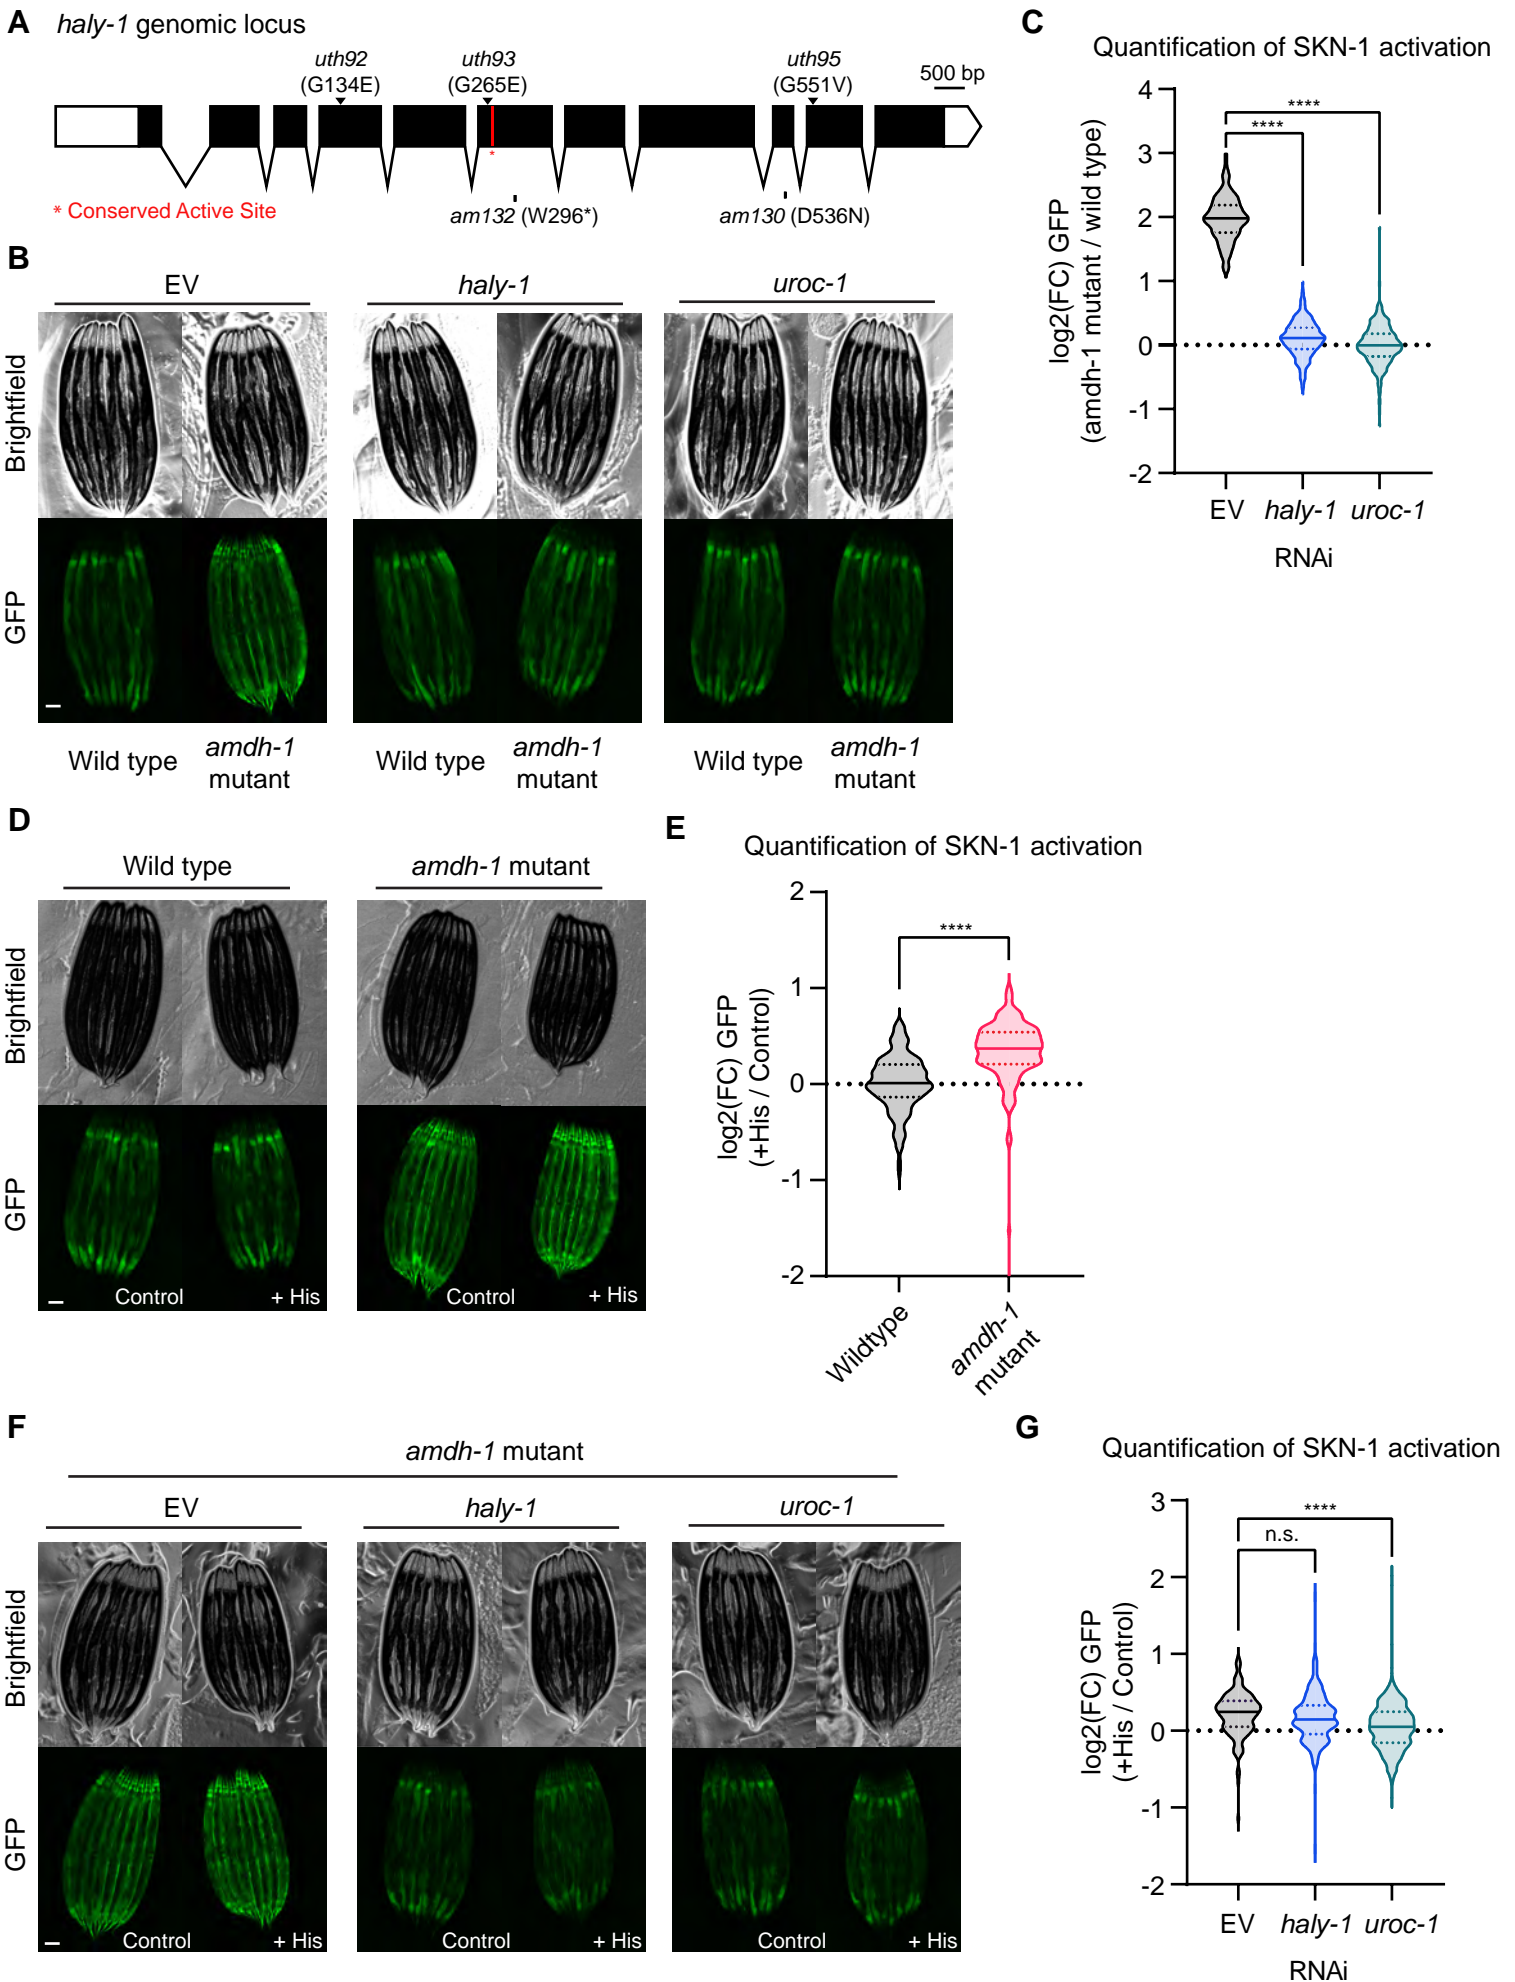

516 **Figure 3. Activation of SKN-1 requires upstream histidine catabolism enzymes and likely**  
517 **proceeds through the buildup of a metabolic intermediate**

518 (A) Schematic of *haly-1* genomic locus labelling novel alleles from EMS screen (top, arrows). A  
519 conserved active site is labelled in red and two existing alleles are labelled (bottom). Scale bar,  
520 500 bp. (B) Fluorescent images of SKN-1 reporter animals in a wildtype or *amdh-1(uth29)*  
521 mutant background fed RNAi targeting *haly-1* and *uroc-1*. Scale bar, 100  $\mu$ m. (C) Quantification  
522 of SKN-1 activation (*amdh-1* mutant normalized to median of wild type) from (B), Data shown  
523 are representative of n = 3 biological replicates with n > 250 animals per condition for each  
524 replicate. \*\*\*\* = P < 0.0001 using a one-way ANOVA. (D) Fluorescent images of SKN-1  
525 reporter animals in a wildtype or *amdh-1(uth29)* mutant background with (+ His) or without  
526 (control) 10mM histidine added to the media. Scale bar, 100  $\mu$ m. (E) Quantification of SKN-1  
527 activation (+His normalized to median of control) from (D), Data shown are representative of n  
528 = 3 biological replicates with n > 141 animals per condition for each replicate. \*\*\*\* = P <  
529 0.0001 Mann-whitney U test. (F) Fluorescent images of SKN-1 reporter animals in an *amdh-*  
530 *1(uth29)* mutant background fed RNAi with or without 10mM histidine added to the media.  
531 Scale bar, 100  $\mu$ m. (G) Quantification of SKN-1 activation (+His normalized to median of  
532 control) from (F), Data shown are representative of n = 3 biological replicates with n > 193  
533 animals per condition for each replicate. \*\*\*\* = P < 0.0001 one-way ANOVA.

534

535

536



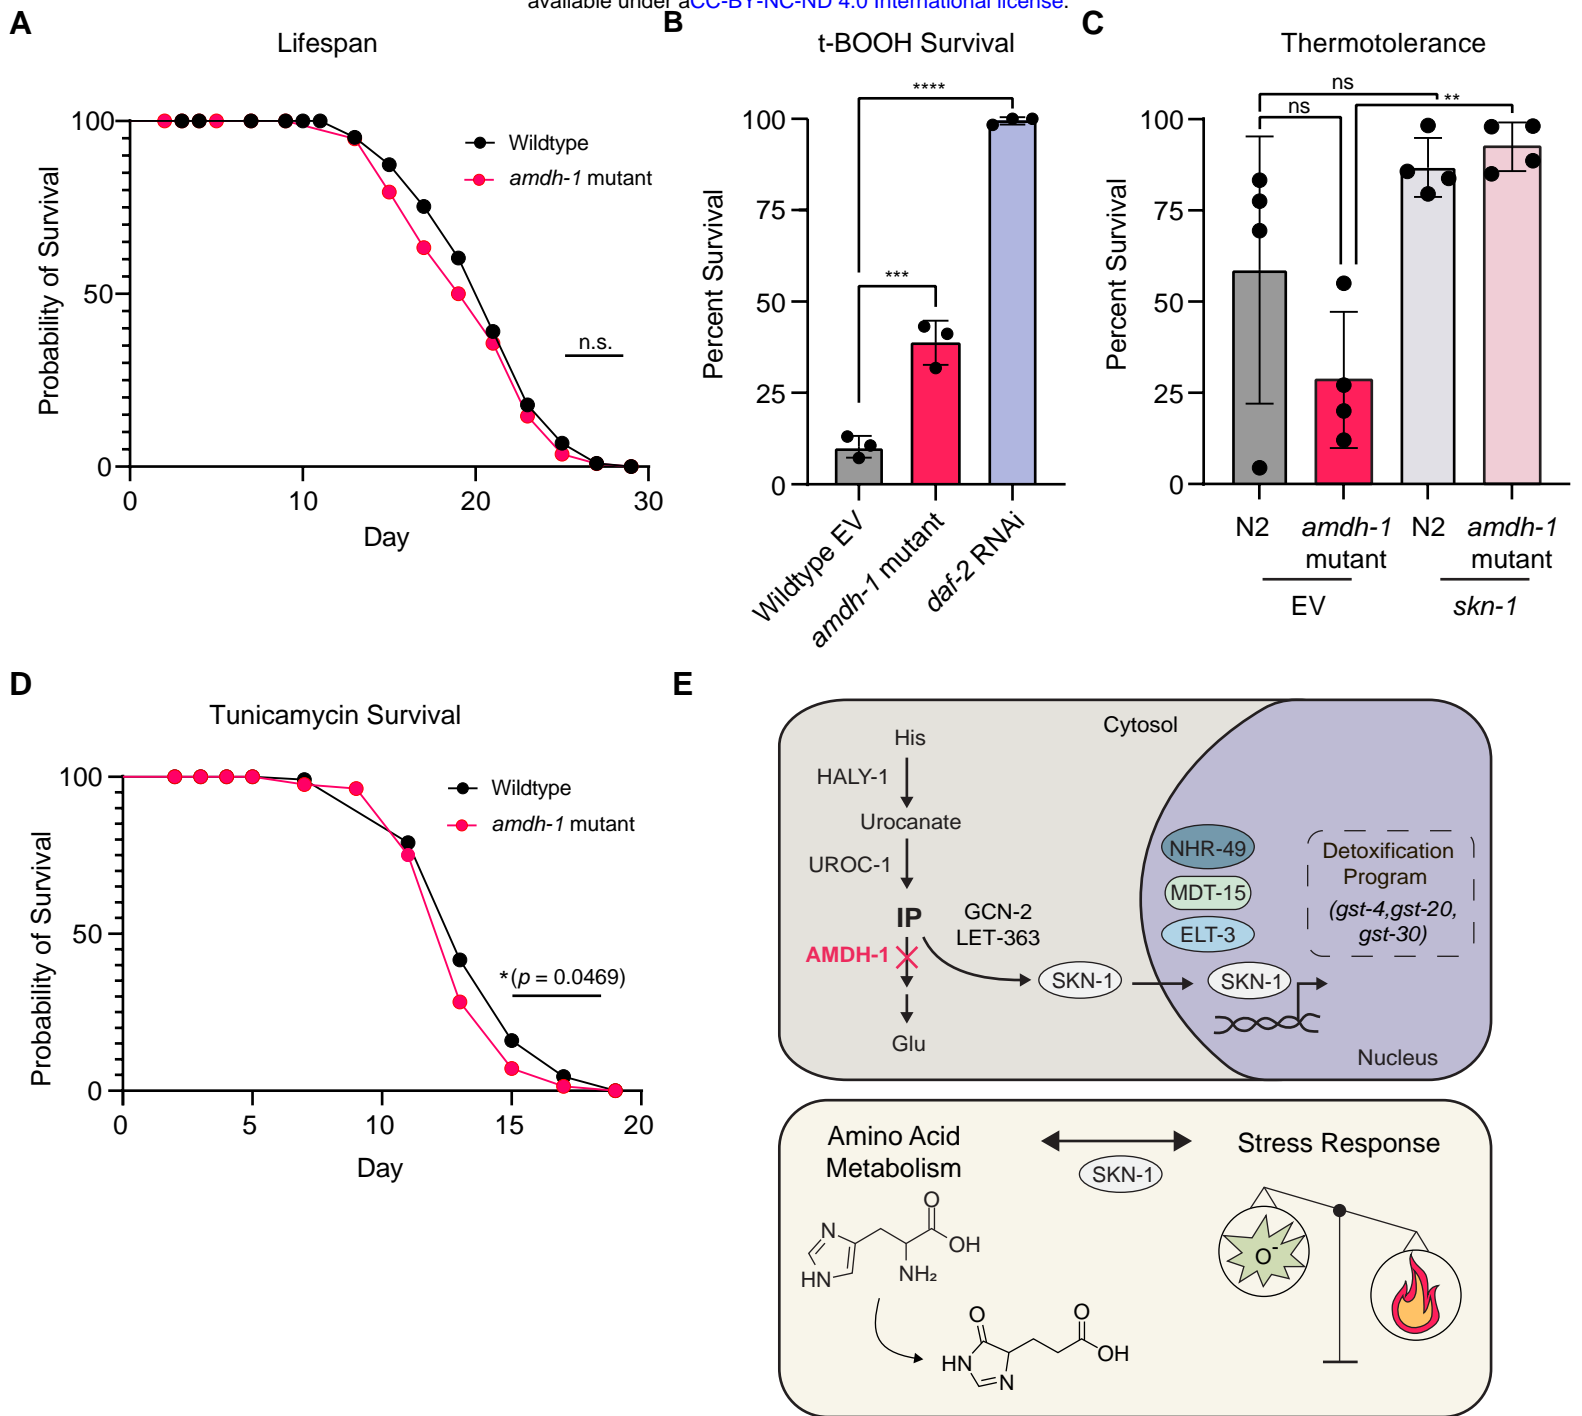

537 **Figure 4. Physiological consequences of SKN-1 activation in *amdh-1* mutants**

538 (A) Survival of wildtype animals (N2) and *amdh-1(uth29)* mutant worms at 20°C. Each data  
539 point represents one biological replicate of  $n > 40$ . One-way ANOVA with Šídák's multiple  
540 comparisons test, \*\* =  $P < .01$ . (B) Survival of animals on plates containing 7.5mM t-BOOH for  
541 16 hours. One-way ANOVA with Šídák's multiple comparisons test, \*\*\* =  $P < 0.001$ , \*\*\*\* =  $P$   
542  $< 0.0001$  (C) Thermotolerance of animals shifted to heat shock temperature (34°C) for 14-15  
543 hours. One-way ANOVA with Šídák's multiple comparisons test, \*\* =  $P < .01$  (D) Survival of  
544 animals on 25ng/ $\mu$ L tunicamycin plates (E) Schematic of findings. *Top* - Perturbation of histidine  
545 catabolism via *amdh-1* mutation leads to a buildup of a catabolite that, directly or indirectly,  
546 activates a transcriptional program of detoxification enzymes driven by SKN-1. This response  
547 requires nuclear factors NHR-49, MDT-15 and ELT-3. *Bottom* - Activation of SKN-1 via  
548 perturbation of histidine catabolism leads to a physiological tradeoff of increased oxidative stress  
549 resistance and decreased heat tolerance
